# Supplementary material
Source: Springer Nature journal article supplement (https://www.springermedizin.de/resource/supplementary/12913_2009_1059_MOESM1_ESM.pdf/9536238)

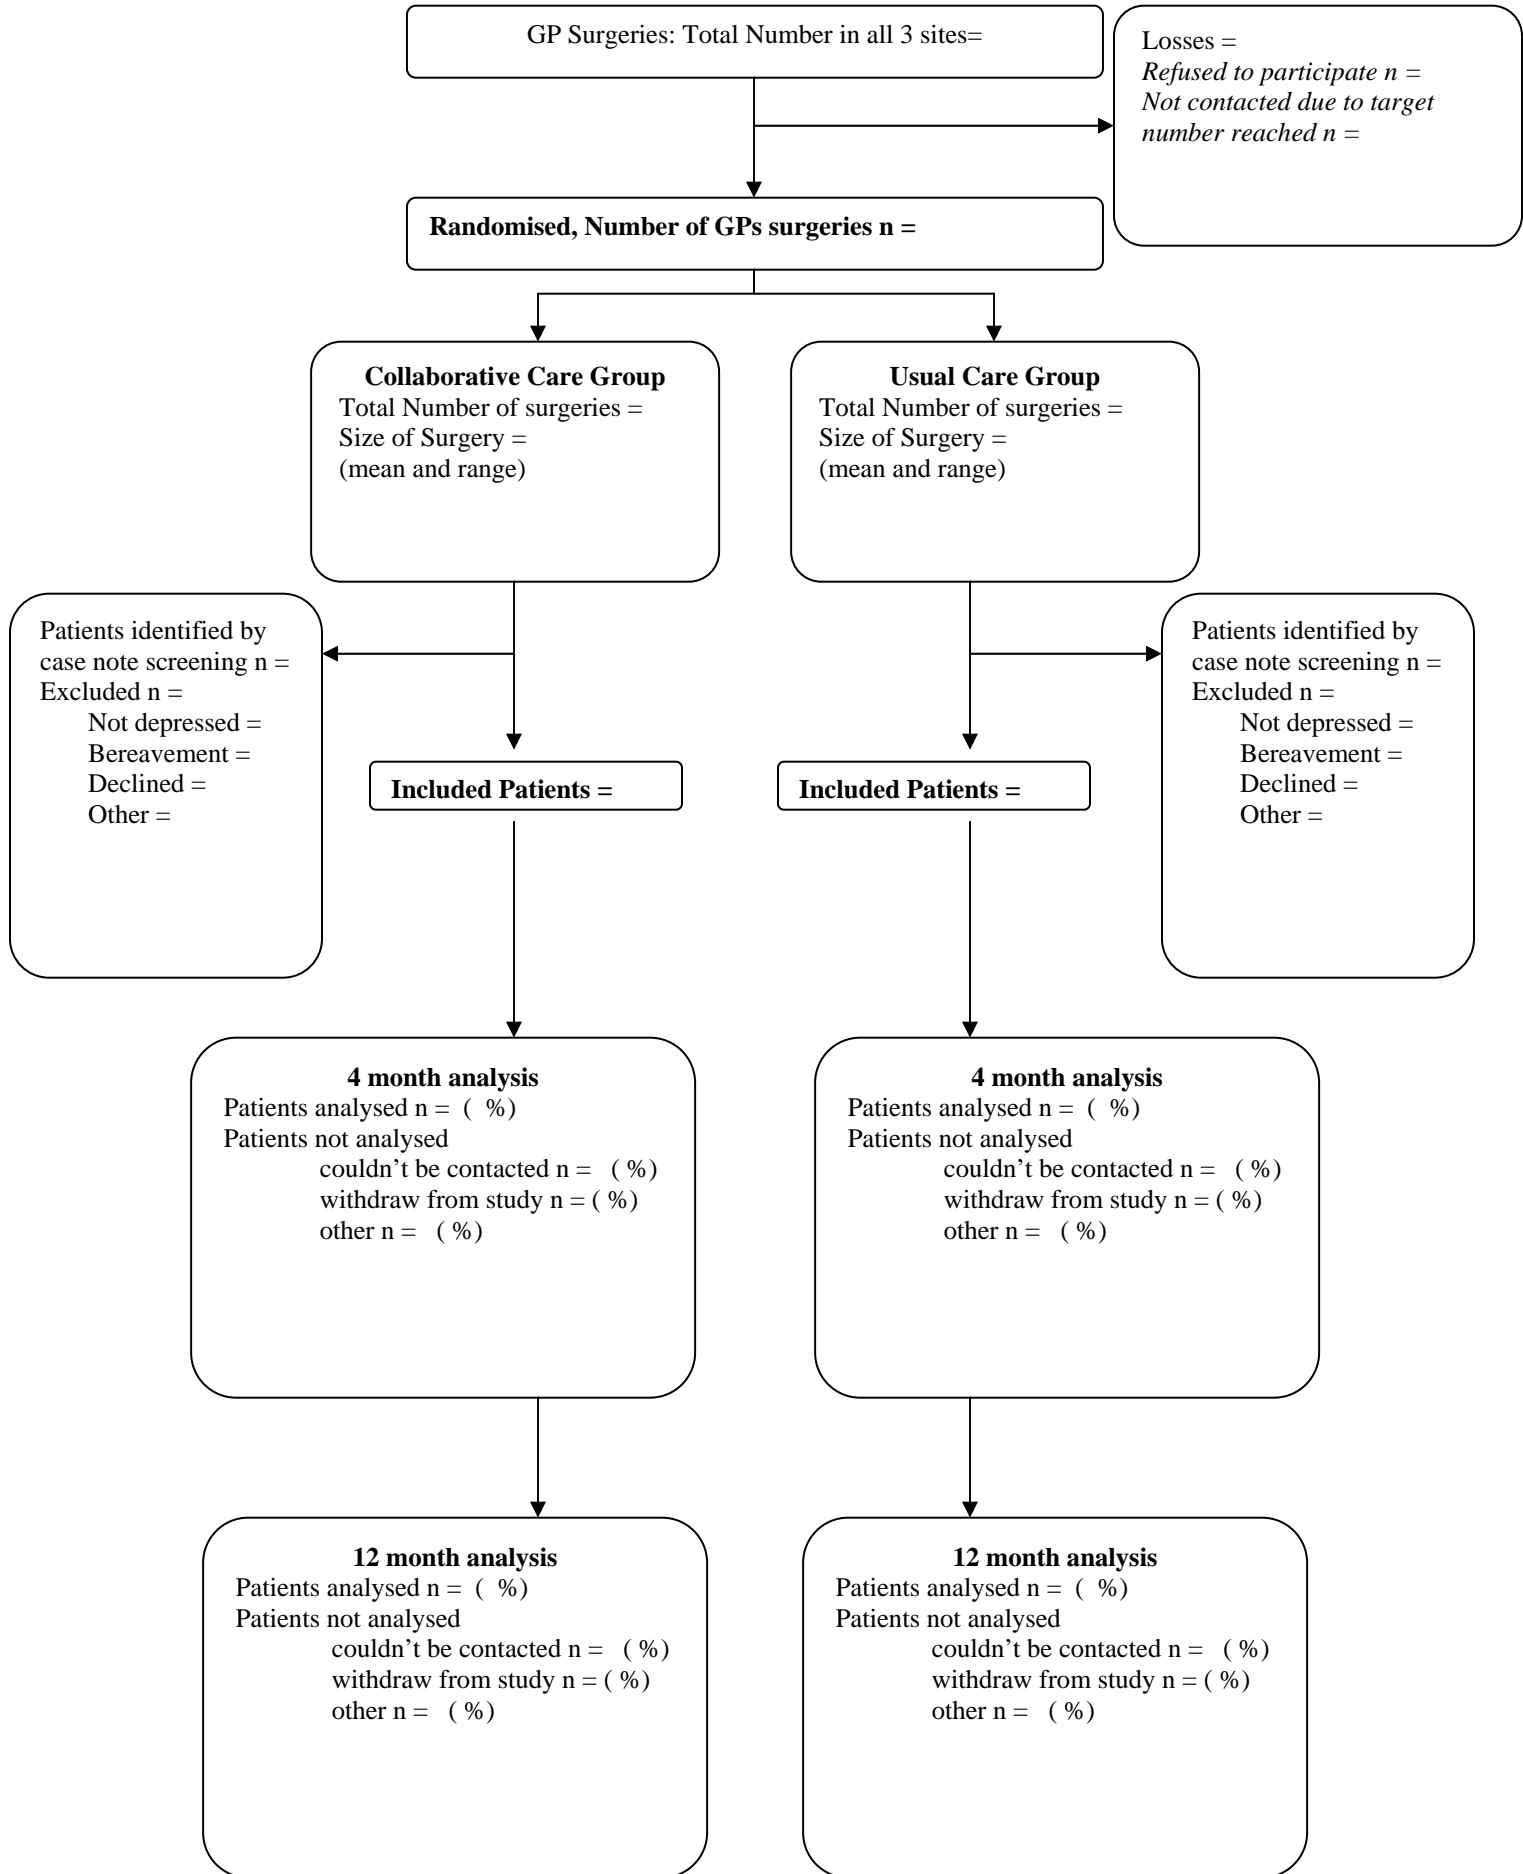

Supplement: MOESM1 [file 9536238]
